# Supplementary material for: Characterization of an Arginine Decarboxylase from Streptococcus pneumoniae by Ultrahigh-Performance Liquid Chromatography–Tandem Mass Spectrometry
Source: MDPI journal article supplement (doi:10.3390/biom14040463), 2024-04-10
Supplement: s1 [file biomolecules-2944760-supplementary.pdf › biomolecules-2944760-supplementary.pdf]

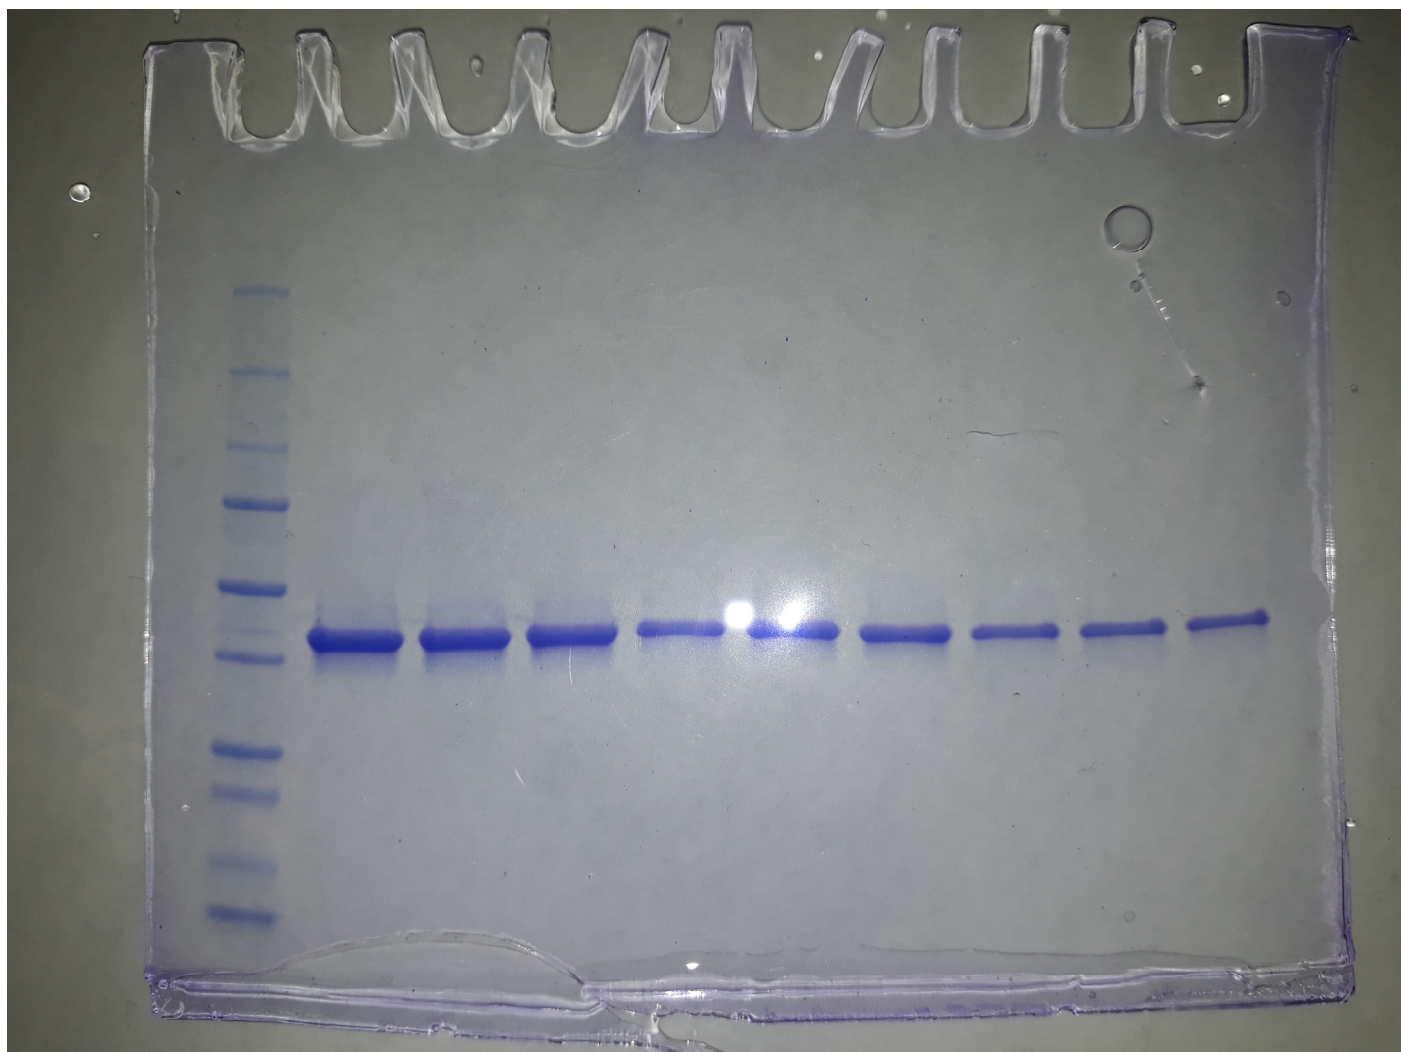

**Figure S1.** Expression and purification of recombinant SP\_0166 resolved by sodium dodecyl sulfate polyacrylamide gel electrophoresis.
